# Supplementary material for: Three porous metal–organic frameworks based on an azobenzenetricarboxylate ligand: synthesis, structures, and magnetic properties
Source: Royal Society of Chemistry journal article supplement (doi:10.1039/c1ce05817g), 2011-01-01
Supplement: c1ce05817g.pdf [file c1ce05817g.pdf]

Supporting information for

**Three porous metal-organic frameworks based on  
azobenzenetricarboxylate ligand: synthesis, structures, and magnetic  
property**

Miao Meng, Di-Chang Zhong\* and Tong-Bu Lu\*

**Table S1** Selected bond distances (Å) and angles (°) for **1-3**

| 1                   |            |                      |            |                     |            |
|---------------------|------------|----------------------|------------|---------------------|------------|
| Cd(1)-O(8)          | 2.245(4)   | Cd(1)-O(7)           | 2.316(4)   | Cd(1)-O(5)#1        | 2.353(3)   |
| Cd(1)-O(3)#2        | 2.360(3)   | Cd(1)-O(1)           | 2.366(3)   | Cd(1)-O(4)#2-       | 2.377(3)   |
| Cd(1)-O(6)#1        | 2.442(3)   | Cd(1)-O(8)           | 2.245(4)   |                     |            |
| C(1)-O1             | 1.223(6)   | C(1)-O2              | 1.315(6)   |                     |            |
| O(8)-Cd(1)-O(7)     | 176.55(13) | O(8)-Cd(1)-O(5)#1    | 95.56(14)  | O(7)-Cd(1)-O(5)#1   | 84.77(13)  |
| O(8)-Cd(1)-O(3)#2   | 92.01(13)  | O(7)-Cd(1)-O(3)#2    | 88.96(13)  | O(5)#1-Cd(1)-O(3)#2 | 156.96(12) |
| O(8)-Cd(1)-O(1)     | 90.55(14)  | O(7)-Cd(1)-O(1)      | 92.88(13)  | O(5)#1-Cd(1)-O(1)   | 78.36(11)  |
| O(3)#2-Cd(1)-O(1)   | 79.84(12)  | O(8)-Cd(1)-O(4)#2    | 95.05(14)  | O(7)-Cd(1)-O(4)#2   | 82.78(13)  |
| O(5)#1-Cd(1)-O(4)#2 | 144.72(13) | O(3)#2-Cd(1)-O(4)#2  | 55.44(12)  | O(1)-Cd(1)-O(4)#2   | 135.04(12) |
| O(8)-Cd(1)-O(6)#1   | 85.79(14)  | O(7)-Cd(1)-O(6)#1    | 91.64(13)  | O(5)#1-Cd(1)-O(6)#1 | 54.17(11)  |
| O(3)#2-Cd(1)-O(6)#1 | 148.41(12) | O(1)-Cd(1)-O(6)#1    | 131.63(11) | O(4)#2-Cd(1)-O(6)#1 | 93.30(12)  |
| 2                   |            |                      |            |                     |            |
| Cd(1)-O(4)#1        | 2.256(5)   | Cd(1)-O(9)           | 2.289(6)   | Cd(1)-O(8)          | 2.299(5)   |
| Cd(1)-O(2)          | 2.312(5)   | Cd(1)-O(7)           | 2.315(5)   | Cd(1)-O(1)          | 2.537(5)   |
| Cd(1)-O(3)#1        | 2.575(5)   | Cd(2)-O(6)           | 2.236(4)   | Cd(2)-O(6)#2        | 2.236(4)   |
| Cd(2)-O(10)         | 2.243(9)   | Cd(2)-O(11)          | 2.275(5)   | Cd(2)-O(11)#2       | 2.275(5)   |
| O(4)#1-Cd(1)-O(9)   | 89.5(2)    | O(4)#1-Cd(1)-O(8)    | 139.32(17) | O(9)-Cd(1)-O(8)     | 95.7(2)    |
| O(4)#1-Cd(1)-O(2)   | 83.84(17)  | O(9)-Cd(1)-O(2)      | 87.1(2)    | O(8)-Cd(1)-O(2)     | 136.60(17) |
| O(4)#1-Cd(1)-O(7)   | 93.5(2)    | O(9)-Cd(1)-O(7)      | 174.27(19) | O(8)-Cd(1)-O(7)     | 85.20(19)  |
| O(2)-Cd(1)-O(7)     | 88.3(2)    | O(4)#1-Cd(1)-O(1)    | 137.28(16) | O(9)-Cd(1)-O(1)     | 84.57(18)  |
| O(8)-Cd(1)-O(1)     | 83.40(16)  | O(2)-Cd(1)-O(1)      | 53.68(15)  | O(7)-Cd(1)-O(1)     | 89.92(17)  |
| O(4)#1-Cd(1)-O(3)#1 | 53.72(16)  | O(9)-Cd(1)-O(3)#1    | 88.88(19)  | O(8)-Cd(1)-O(3)#1   | 85.98(16)  |
| O(2)-Cd(1)-O(3)#1   | 137.41(16) | O(7)-Cd(1)-O(3)#1    | 96.83(18)  | O(1)-Cd(1)-O(3)#1   | 166.90(14) |
| O(6)-Cd(2)-O(6)#2   | 172.8(3)   | O(6)-Cd(2)-O(10)     | 86.39(16)  | O(6)#2-Cd(2)-O(10)  | 86.39(16)  |
| O(6)-Cd(2)-O(11)    | 79.48(19)  | O(6)#2-Cd(2)-O(11)   | 105.46(19) | O(10)-Cd(2)-O(11)   | 131.77(16) |
| O(6)-Cd(2)-O(11)#2  | 105.46(19) | O(6)#2-Cd(2)-O(11)#2 | 79.48(19)  | O(10)-Cd(2)-O(11)#2 | 131.77(16) |
| O(11)-Cd(2)-O(11)#2 | 96.5(3)    |                      |            |                     |            |

3

|                      |            |                      |           |                      |            |
|----------------------|------------|----------------------|-----------|----------------------|------------|
| Mn(1)-O(9)#1         | 2.094(5)   | Mn(1)-O(12)#2        | 2.109(5)  | Mn(1)-O(14)          | 2.168(6)   |
| Mn(1)-O(1)           | 2.183(5)   | Mn(1)-O(4)#3         | 2.259(5)  | Mn(1)-O(13)          | 2.297(5)   |
| Mn(2)-O(7)           | 2.133(5)   | Mn(2)-O(10)#1        | 2.148(5)  | Mn(2)-O(3)#3         | 2.158(5)   |
| Mn(2)-O(15)          | 2.165(5)   | Mn(2)-O(6)#4         | 2.166(5)  | Mn(2)-O(13)          | 2.323(5)   |
| Mn(3)-O(11)#2        | 2.106(5)   | Mn(3)-O(5)#5         | 2.131(5)  | Mn(3)-O(16)          | 2.168(5)   |
| Mn(3)-O(17)          | 2.201(5)   | Mn(3)-O(8)           | 2.254(5)  | Mn(3)-O(2)#6         | 2.265(5)   |
| O(9)#1-Mn(1)-O(12)#2 | 170.3(2)   | O(9)#1-Mn(1)-O(14)   | 89.3(2)   | O(12)#2-Mn(1)-O(14)  | 94.0(2)    |
| O(9)#1-Mn(1)-O(1)    | 91.0(2)    | O(12)#2-Mn(1)-O(1)   | 98.11(19) | O(14)-Mn(1)-O(1)     | 90.5(2)    |
| O(9)#1-Mn(1)-O(4)#3  | 86.44(18)  | O(12)#2-Mn(1)-O(4)#3 | 84.34(16) | O(14)-Mn(1)-O(4)#3   | 92.1(2)    |
| O(1)-Mn(1)-O(4)#3    | 176.25(19) | O(9)#1-Mn(1)-O(13)   | 89.4(2)   | O(12)#2-Mn(1)-O(13)  | 87.82(19)  |
| O(14)-Mn(1)-O(13)    | 176.4(2)   | O(1)-Mn(1)-O(13)     | 86.18(18) | O(4)#3-Mn(1)-O(13)   | 91.09(18)  |
| O(7)-Mn(2)-O(10)#1   | 179.5(2)   | O(7)-Mn(2)-O(3)#3    | 90.2(2)   | O(10)#1-Mn(2)-O(3)#3 | 90.2(2)    |
| O(7)-Mn(2)-O(15)     | 89.4(2)    | O(10)#1-Mn(2)-O(15)  | 90.9(2)   | O(3)#3-Mn(2)-O(15)   | 91.7(2)    |
| O(7)-Mn(2)-O(6)#4    | 94.7(2)    | O(10)#1-Mn(2)-O(6)#4 | 84.84(19) | O(3)#3-Mn(2)-O(6)#4  | 173.4(2)   |
| O(15)-Mn(2)-O(6)#4   | 92.8(2)    | O(7)-Mn(2)-O(13)     | 86.28(18) | O(10)#1-Mn(2)-O(13)  | 93.40(19)  |
| O(3)#3-Mn(2)-O(13)   | 89.65(18)  | O(15)-Mn(2)-O(13)    | 175.5(2)  | O(6)#4-Mn(2)-O(13)   | 86.25(18)  |
| O(11)#2-Mn(3)-O(5)#5 | 163.3(2)   | O(11)#2-Mn(3)-O(16)  | 99.0(2)   | O(5)#5-Mn(3)-O(16)   | 97.8(2)    |
| O(11)#2-Mn(3)-O(17)  | 82.3(2)    | O(5)#5-Mn(3)-O(17)   | 81.0(2)   | O(16)-Mn(3)-O(17)    | 178.7(2)   |
| O(11)#2-Mn(3)-O(8)   | 84.4(2)    | O(5)#5-Mn(3)-O(8)    | 97.4(2)   | O(16)-Mn(3)-O(8)     | 85.1(2)    |
| O(17)-Mn(3)-O(8)     | 94.7(2)    | O(11)#2-Mn(3)-O(2)#6 | 95.16(19) | O(5)#5-Mn(3)-O(2)#6  | 86.7(2)    |
| O(16)-Mn(3)-O(2)#6   | 82.3(2)    | O(17)-Mn(3)-O(2)#6   | 97.9(2)   | O(8)-Mn(3)-O(2)#6    | 167.18(19) |

Symmetry codes for **1**: #1 = x-1, y, z+1; #2 = -x+2, y+1/2, -z+3/2; #3 = -x+2, y-1/2, -z+3/2; #4 = x+1, y, z-1; **2**: #1 = x-1/2, y+1/2, z; #2 = -x+1, y, -z; #3 = x+1/2, y-1/2, z; #4 = -x+1, y, -z+1; **3**: #1 = x+1/2, -y+3/2, z+1/2; #2 = x+1/2, y-1/2, z; #3 = x, -y+1, z+1/2; #4 = x-1/2, y+1/2, z; #5 = x-1/2, y+3/2, z; #6 = x, y+1, z; #7 = x, y-1, z; #8 = x, -y+1, z-1/2; #9 = x+1/2, y-3/2, z; #10 = x-1/2, -y+3/2, z-1/2.

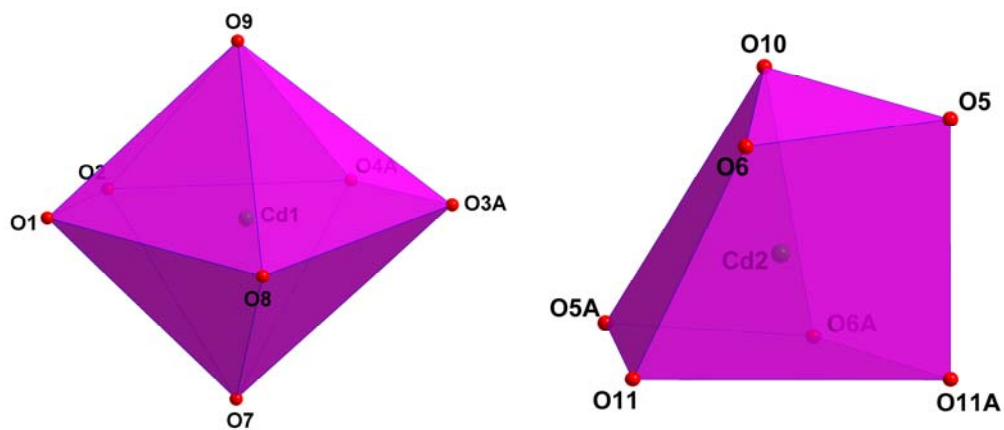

**Fig. S1** The coordination geometries of Cd1 and Cd2 in **2**.

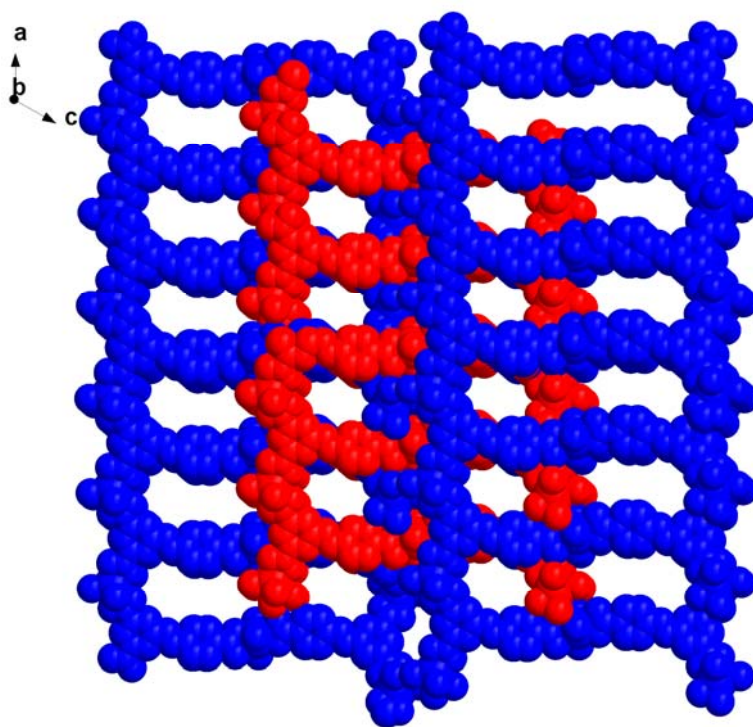

**Fig. S2** The 3D porous structure of **2**.

## Topological Analysis for 1 and 2 by TOPOS 4.0.

### $\{[\text{Cd}(\text{HABTC})(\text{H}_2\text{O})_2]\cdot 3\text{H}_2\text{O}\}_n$ (1)

Topology for C1 (HABTC<sup>2-</sup>)

The links to Atom C1

|     |         |         |        |          |          |
|-----|---------|---------|--------|----------|----------|
| Cd1 | 0.3886  | -0.2853 | 0.3094 | (1 -1 0) | 6.418 Å  |
| Cd1 | 0.6114  | 0.2147  | 0.1906 | (0 0 0)  | 6.489 Å  |
| Cd1 | -0.3886 | 0.2147  | 1.1906 | (-1 0 1) | 10.568 Å |

Topology for Cd1

The links to Atom Cd1

|    |        |        |         |          |          |
|----|--------|--------|---------|----------|----------|
| C1 | 0.7622 | 0.5233 | -0.0252 | (1 0 0)  | 6.418 Å  |
| C1 | 0.2378 | 0.0233 | 0.5252  | (0 0 0)  | 6.489 Å  |
| C1 | 1.2378 | 0.0233 | -0.4748 | (1 0 -1) | 10.568 Å |

Vertex symbols for selected sublattice

-----  
C1 Point (Schlafli) symbol: {6^3}

Extended point symbol: [6.6.6]  
-----

-----  
Cd1 Point (Schlafli) symbol: {6^3}

Extended point symbol: [6.6.6]  
-----

Point (Schlafli) symbol for net: {6^3}

3,3-c net; uninodal net

Topological type: hcb; Shubnikov hexagonal plane net/(6,3) (topos&RCSR.ttd) {6^3}

- VS [6.6.6] (67358 types in 9 databases)

Elapsed time: 6.83 sec.

### $\{[\text{Cd}_3(\text{ABTC})_2(\text{H}_2\text{O})_9]\cdot \text{CH}_3\text{OH}\cdot \text{DMF}\cdot 2\text{H}_2\text{O}\}_n$ (2)

Topology for Sc1 (ABTC<sup>3-</sup>)

The links to Atom Sc1

---

|     |        |         |         |          |          |
|-----|--------|---------|---------|----------|----------|
| Sc1 | 0.3276 | 0.9647  | 0.7267  | (-1 0 0) | 10.165 Å |
| Sc1 | 1.3276 | -0.0353 | 0.7267  | (0-1 0)  | 10.165 Å |
| Sc1 | 0.1724 | 0.4647  | -0.7267 | (1 0 0)  | 23.778 Å |

---

Vertex symbols for selected sublattice

-----

Sc1 Point (Schlafli) symbol: {8<sup>2</sup>.10}

Extended point symbol: [8(2).8(2).10(2)]

-----

Point (Schlafli) symbol for net: {8<sup>2</sup>.10}

3-c net; uninodal net

Topological type: 2(3)2/2-plane minimal net; plane SP KIa (topos&RCSR.ttd)

{8<sup>2</sup>.10} - VS [8(2).8(2).\*] (67358 types in 9 databases)

Elapsed time: 2.83 sec.
